# Supplementary material for: Impact of Titanium Oxide Nanoparticles on Growth, Pigment Content, Membrane Stability, DNA Damage, and Stress-Related Gene Expression in Vicia faba under Saline Conditions
Source: MDPI journal article supplement (doi:10.3390/horticulturae9091030), 2023-09-13
Supplement: s1 [file s1]

Table S1. Description of experimental treatments

| Treatment | Description                                                               |
|-----------|---------------------------------------------------------------------------|
| Control   | Irrigated with half streangth hogland soulution                           |
| T1        | 10 ppm nTiO <sub>2</sub> in half streangth hogland soulution              |
| T2        | 20 ppm nTiO <sub>2</sub> in half streangth hogland soulution              |
| S1        | 100mM NaCl in half streangth hogland soulution                            |
| S2        | 200 mM Nacl in half streangth hogland soulution                           |
| S1T1      | 100mM NaCl + 10 ppm nTiO <sub>2</sub> in half streangth hogland soulution |
| S1T2      | 100mM NaCl + 20 ppm nTiO <sub>2</sub> in half streangth hogland soulution |
| S2T1      | 200mM NaCl + 10 ppm nTiO <sub>2</sub> in half streangth hogland soulution |
| S2T2      | 200mM NaCl + 20 ppm nTiO <sub>2</sub> in half streangth hogland soulution |
